# Supplementary material for: New pecJ-n (n = 1, 2) Basis Sets for Selenium Atom Purposed for the Calculations of NMR Spin–Spin Coupling Constants Involving Selenium
Source: MDPI journal article supplement (doi:10.3390/ijms24097841), 2023-04-25
Supplement: s1 [file s1]

# New pecJ-*n* (*n* = 1, 2) basis sets for selenium atom purposed for the calculations of NMR spin-spin coupling constants involving selenium

by Yuriy Yu. Rusakov and Irina L. Rusakova

**Table S1.** Equilibrium geometries of two fitting molecules SeH<sub>2</sub> and Se=C and that of testing compounds 1-7 (the level of optimization is M06-2X/pc-3).

| Molecule                            | Cartesian Coordinates, Å |           |           |           |
|-------------------------------------|--------------------------|-----------|-----------|-----------|
| SeH <sub>2</sub>                    | Se                       | 0.000000  | 0.000000  | 0.056114  |
|                                     | H                        | 0.000000  | 1.037025  | -0.953934 |
|                                     | H                        | 0.000000  | -1.037025 | -0.953934 |
| Se=C                                | Se                       | 0.000000  | 0.000000  | 0.000000  |
|                                     | C                        | 0.000000  | 0.000000  | 1.662334  |
| Me <sub>2</sub> Se <sub>2</sub> (1) | Se                       | 1.100384  | -0.314408 | -0.365502 |
|                                     | Se                       | -1.100384 | -0.314408 | 0.365502  |
|                                     | C                        | 1.833865  | 1.105028  | 0.761441  |
|                                     | C                        | -1.833865 | 1.105028  | -0.761441 |
|                                     | H                        | -2.886182 | 1.187824  | -0.501994 |
|                                     | H                        | -1.327234 | 2.040257  | -0.551343 |
|                                     | H                        | -1.726611 | 0.831620  | -1.804492 |
|                                     | H                        | 2.886182  | 1.187825  | 0.501994  |
|                                     | H                        | 1.327233  | 2.040257  | 0.551343  |
|                                     | H                        | 1.726612  | 0.831620  | 1.804492  |
| MeSe-C≡N (2)                        | Se                       | 0.000000  | 0.627734  | 0.000000  |
|                                     | C                        | -1.768006 | -0.210961 | 0.000000  |
|                                     | C                        | 0.960919  | -0.946889 | 0.000000  |
|                                     | N                        | 1.582618  | -1.914747 | 0.000000  |
|                                     | H                        | -2.468657 | 0.618486  | 0.000000  |
|                                     | H                        | -1.883574 | -0.805551 | -0.897914 |
|                                     | H                        | -1.883574 | -0.805551 | 0.897914  |
| MeSeH (3)                           | Se                       | -0.031519 | -0.420629 | 0.000000  |
|                                     | C                        | -0.031519 | 1.535877  | 0.000000  |
|                                     | H                        | -1.075925 | 1.832110  | 0.000000  |
|                                     | H                        | 0.454225  | 1.910104  | 0.893578  |

|                                      |    |           |           |           |
|--------------------------------------|----|-----------|-----------|-----------|
|                                      | H  | 0.454225  | 1.910104  | -0.893578 |
|                                      | H  | 1.428243  | -0.566192 | 0.000000  |
| Me <sub>2</sub> P(Se)Cl (4)          | Se | 0.604223  | -1.487019 | 0.000000  |
|                                      | C  | 0.604223  | 1.472323  | -1.445083 |
|                                      | C  | 0.604223  | 1.472323  | 1.445083  |
|                                      | P  | 0.074674  | 0.528807  | 0.000000  |
|                                      | Cl | -1.953068 | 0.887047  | 0.000000  |
|                                      | H  | 0.205180  | 0.992997  | -2.335231 |
|                                      | H  | 0.246799  | 2.497551  | -1.375522 |
|                                      | H  | 1.691921  | 1.448872  | -1.479959 |
|                                      | H  | 0.205180  | 0.992997  | 2.335231  |
|                                      | H  | 1.691921  | 1.448872  | 1.479959  |
|                                      | H  | 0.246799  | 2.497551  | 1.375522  |
| C <sub>4</sub> H <sub>4</sub> Se (5) | Se | 0.000000  | 0.000000  | 0.907629  |
|                                      | C  | 0.000000  | 1.282615  | -0.439200 |
|                                      | C  | 0.000000  | 0.714941  | -1.669269 |
|                                      | C  | 0.000000  | -0.714941 | -1.669269 |
|                                      | C  | 0.000000  | -1.282615 | -0.439200 |
|                                      | H  | 0.000000  | 2.332883  | -0.200899 |
|                                      | H  | 0.000000  | 1.299798  | -2.577980 |
|                                      | H  | 0.000000  | -1.299798 | -2.577980 |
|                                      | H  | 0.000000  | -2.332883 | -0.200899 |
| SePMe <sub>3</sub> (6)               | Se | 0.000000  | 0.000000  | 1.446013  |
|                                      | C  | 0.000000  | 1.657972  | -1.402209 |
|                                      | C  | -1.435846 | -0.828986 | -1.402209 |
|                                      | C  | 1.435846  | -0.828986 | -1.402209 |
|                                      | P  | 0.000000  | 0.000000  | -0.670630 |
|                                      | H  | 0.885133  | 2.191102  | -1.063283 |
|                                      | H  | 0.000000  | 1.592014  | -2.489722 |
|                                      | H  | -0.885133 | 2.191102  | -1.063283 |
|                                      | H  | -1.454984 | -1.862098 | -1.063283 |
|                                      | H  | -2.340116 | -0.329004 | -1.063283 |
|                                      | H  | -1.378725 | -0.796007 | -2.489722 |
|                                      | H  | 1.454984  | -1.862098 | -1.063283 |
|                                      | H  | 1.378725  | -0.796007 | -2.489722 |
|                                      | H  | 2.340116  | -0.329004 | -1.063283 |
| SiH <sub>3</sub> SeH (7)             | Se | 0.026466  | -0.774339 | 0.000000  |
|                                      | Si | 0.026466  | 1.516254  | 0.000000  |
|                                      | H  | 1.450595  | 1.886490  | 0.000000  |
|                                      | H  | -0.641066 | 2.037802  | -1.204002 |
|                                      | H  | -0.641066 | 2.037802  | 1.204002  |
|                                      | H  | -1.438853 | -0.862133 | 0.000000  |

**Table S2.** Basis set pecJ-1 for selenium, CFOUR format.

```
SE:pecJ-1
Property-energy consistent basis set

4
  0  1  2  3
11  7  5  3
16 11  7  3

2.738937E+07 4.117126E+06 5.008352E+05 8.450803E+04 1.940949E+04
5.478217E+03 1.785352E+03 6.442465E+02 2.515808E+02 1.039878E+02
3.331319E+01 1.424322E+01 4.067050E+00 1.754643E+00 3.363182E-01
1.350861E-01

1.3584E-06 4.2916E-07 0.00000000 0.00000000 0.00000000 0.00000000 0.00000000
0.00000000 0.00000000 0.00000000 0.00000000
1.7390E-05 5.4121E-06 0.00000000 0.00000000 0.00000000 0.00000000 0.00000000
0.00000000 0.00000000 0.00000000 0.00000000
2.1705E-04 6.8544E-05 0.00000000 0.00000000 0.00000000 0.00000000 0.00000000
0.00000000 0.00000000 0.00000000 0.00000000
1.6462E-03 5.1614E-04 0.00000000 0.00000000 0.00000000 0.00000000 0.00000000
0.00000000 0.00000000 0.00000000 0.00000000
8.6238E-03 2.7472E-03 0.00000000 0.00000000 0.00000000 0.00000000 0.00000000
0.00000000 0.00000000 0.00000000 0.00000000
3.5307E-02 1.1276E-02 0.00000000 0.00000000 0.00000000 0.00000000 0.00000000
0.00000000 0.00000000 0.00000000 0.00000000
1.1465E-01 3.9306E-02 0.00000000 0.00000000 0.00000000 0.00000000 0.00000000
0.00000000 0.00000000 0.00000000 0.00000000
0.00000000 0.00000000 1.00000000 0.00000000 0.00000000 0.00000000 0.00000000
0.00000000 0.00000000 0.00000000 0.00000000
0.00000000 0.00000000 0.00000000 1.00000000 0.00000000 0.00000000 0.00000000
0.00000000 0.00000000 0.00000000 0.00000000
0.00000000 0.00000000 0.00000000 0.00000000 1.00000000 0.00000000 0.00000000
0.00000000 0.00000000 0.00000000 0.00000000
0.00000000 0.00000000 0.00000000 0.00000000 0.00000000 1.00000000 0.00000000
0.00000000 0.00000000 0.00000000 0.00000000
```

```

0.00000000 0.00000000 0.00000000 0.00000000 0.00000000 0.00000000 1.00000000
0.00000000 0.00000000 0.00000000 0.00000000
0.00000000 0.00000000 0.00000000 0.00000000 0.00000000 0.00000000 0.00000000
1.00000000 0.00000000 0.00000000 0.00000000
0.00000000 0.00000000 0.00000000 0.00000000 0.00000000 0.00000000 0.00000000
0.00000000 1.00000000 0.00000000 0.00000000
0.00000000 0.00000000 0.00000000 0.00000000 0.00000000 0.00000000 0.00000000
0.00000000 0.00000000 1.00000000 0.00000000
0.00000000 0.00000000 0.00000000 0.00000000 0.00000000 0.00000000 0.00000000
0.00000000 0.00000000 0.00000000 1.00000000

4.106684E+03 9.693471E+02 3.105258E+02 1.166637E+02 4.812571E+01
2.088559E+01 8.846983E+00 3.839338E+00 1.605191E+00 4.680879E-01
1.490880E-01

1.4225E-03 5.7021E-04 0.00000000 0.00000000 0.00000000 0.00000000 0.00000000
1.2057E-02 4.8491E-03 0.00000000 0.00000000 0.00000000 0.00000000 0.00000000
6.1443E-02 2.4975E-02 0.00000000 0.00000000 0.00000000 0.00000000 0.00000000
2.0152E-01 8.4407E-02 0.00000000 0.00000000 0.00000000 0.00000000 0.00000000
4.0415E-01 1.8090E-01 0.00000000 0.00000000 0.00000000 0.00000000 0.00000000
3.8893E-01 1.7468E-01 0.00000000 0.00000000 0.00000000 0.00000000 0.00000000
0.00000000 0.00000000 1.00000000 0.00000000 0.00000000 0.00000000 0.00000000
0.00000000 0.00000000 0.00000000 1.00000000 0.00000000 0.00000000 0.00000000
0.00000000 0.00000000 0.00000000 0.00000000 1.00000000 0.00000000 0.00000000
0.00000000 0.00000000 0.00000000 0.00000000 0.00000000 1.00000000 0.00000000
0.00000000 0.00000000 0.00000000 0.00000000 0.00000000 0.00000000 1.00000000

1.200481E+02 3.552605E+01 1.289256E+01 4.991605E+00 1.889243E+00
6.476664E-01 1.788622E-01

1.4755E-02 0.00000000 0.00000000 0.00000000 0.00000000
9.1608E-02 0.00000000 0.00000000 0.00000000 0.00000000
2.7516E-01 0.00000000 0.00000000 0.00000000 0.00000000
0.00000000 1.00000000 0.00000000 0.00000000 0.00000000
0.00000000 0.00000000 1.00000000 0.00000000 0.00000000
0.00000000 0.00000000 0.00000000 1.00000000 0.00000000
0.00000000 0.00000000 0.00000000 0.00000000 1.00000000

7.528700E+00 1.282966E+00 3.328661E-01

1.00000000 0.00000000 0.00000000
0.00000000 1.00000000 0.00000000
0.00000000 0.00000000 1.00000000

```

**Table S3.** Basis set pecJ-2 for selenium, CFOUR format.

```

SE:pecJ-2
Property-energy consistent basis set

4
 0  1  2  3  4
15  8  5  4  1
22 13  8  4  1

4.443822E+08 7.050053E+07 1.041355E+07 1.376983E+06 3.335063E+05
9.200230E+04 2.967395E+04 1.070423E+04 4.148222E+03 1.725619E+03

```

[illegible]

```

0.00000000 0.00000000 0.00000000 0.00000000 0.00000000 0.00000000 0.00000000
0.00000000 0.00000000 0.00000000 0.00000000 0.00000000 0.00000000 0.00000000
1.00000000

1.020290E+04 2.385085E+03 7.246974E+02 2.599333E+02 1.042775E+02
4.521224E+01 2.064791E+01 9.300946E+00 4.203860E+00 1.835088E+00
6.372571E-01 2.508116E-01 8.507613E-02

2.8852E-04 1.1040E-04 0.00000000 0.00000000 0.00000000 0.00000000 0.00000000
0.00000000
2.7773E-03 1.0953E-03 0.00000000 0.00000000 0.00000000 0.00000000 0.00000000
0.00000000
1.7261E-02 6.8573E-03 0.00000000 0.00000000 0.00000000 0.00000000 0.00000000
0.00000000
7.4340E-02 3.0010E-02 0.00000000 0.00000000 0.00000000 0.00000000 0.00000000
0.00000000
2.1704E-01 9.1417E-02 0.00000000 0.00000000 0.00000000 0.00000000 0.00000000
0.00000000
3.9428E-01 1.7705E-01 0.00000000 0.00000000 0.00000000 0.00000000 0.00000000
0.00000000
3.6400E-01 1.6148E-01 0.00000000 0.00000000 0.00000000 0.00000000 0.00000000
0.00000000
0.00000000 0.00000000 1.00000000 0.00000000 0.00000000 0.00000000 0.00000000
0.00000000
0.00000000 0.00000000 0.00000000 1.00000000 0.00000000 0.00000000 0.00000000
0.00000000
0.00000000 0.00000000 0.00000000 0.00000000 1.00000000 0.00000000 0.00000000
0.00000000
0.00000000 0.00000000 0.00000000 0.00000000 0.00000000 1.00000000 0.00000000
0.00000000
0.00000000 0.00000000 0.00000000 0.00000000 0.00000000 0.00000000 1.00000000
0.00000000
0.00000000 0.00000000 0.00000000 0.00000000 0.00000000 0.00000000 0.00000000
1.00000000

2.753441E+02 7.795287E+01 2.796792E+01 1.122825E+01 4.658535E+00
1.894959E+00 7.145110E-01 2.286113E-01

2.8912E-03 0.00000000 0.00000000 0.00000000 0.00000000
2.5978E-02 0.00000000 0.00000000 0.00000000 0.00000000
1.1369E-01 0.00000000 0.00000000 0.00000000 0.00000000
2.8390E-01 0.00000000 0.00000000 0.00000000 0.00000000
0.00000000 1.00000000 0.00000000 0.00000000 0.00000000
0.00000000 0.00000000 1.00000000 0.00000000 0.00000000
0.00000000 0.00000000 0.00000000 1.00000000 0.00000000
0.00000000 0.00000000 0.00000000 0.00000000 1.00000000

9.489329E+00 2.271550E+00 5.063583E-01 1.137481E-01

1.00000000 0.00000000 0.00000000 0.00000000
0.00000000 1.00000000 0.00000000 0.00000000
0.00000000 0.00000000 1.00000000 0.00000000
0.00000000 0.00000000 0.00000000 1.00000000

2.237599E-01

1.00000000

```

**Table S4.** Basis set pecJ-1 for selenium, Dalton format.

|                |
|----------------|
| \$ Se          |
| a 34           |
| \$ s functions |
| 16 11 0        |

```

2.738937E+07 1.3584E-06 4.2916E-07 0.00000000 0.00000000 0.00000000 0.00000000 0.00000000 0.00000000 0.00000000 0.00000000
0.00000000
4.117126E+06 1.7390E-05 5.4121E-06 0.00000000 0.00000000 0.00000000 0.00000000 0.00000000 0.00000000 0.00000000 0.00000000
0.00000000
5.008352E+05 2.1705E-04 6.8544E-05 0.00000000 0.00000000 0.00000000 0.00000000 0.00000000 0.00000000 0.00000000 0.00000000
0.00000000
8.450803E+04 1.6462E-03 5.1614E-04 0.00000000 0.00000000 0.00000000 0.00000000 0.00000000 0.00000000 0.00000000 0.00000000
0.00000000
1.940949E+04 8.6238E-03 2.7472E-03 0.00000000 0.00000000 0.00000000 0.00000000 0.00000000 0.00000000 0.00000000 0.00000000
0.00000000
5.478217E+03 3.5307E-02 1.1276E-02 0.00000000 0.00000000 0.00000000 0.00000000 0.00000000 0.00000000 0.00000000 0.00000000
0.00000000
1.785352E+03 1.1465E-01 3.9306E-02 0.00000000 0.00000000 0.00000000 0.00000000 0.00000000 0.00000000 0.00000000 0.00000000
0.00000000
6.442465E+02 0.00000000 0.00000000 1.00000000 0.00000000 0.00000000 0.00000000 0.00000000 0.00000000 0.00000000 0.00000000
0.00000000
2.515808E+02 0.00000000 0.00000000 0.00000000 1.00000000 0.00000000 0.00000000 0.00000000 0.00000000 0.00000000 0.00000000
0.00000000
1.039878E+02 0.00000000 0.00000000 0.00000000 0.00000000 1.00000000 0.00000000 0.00000000 0.00000000 0.00000000 0.00000000
0.00000000
3.331319E+01 0.00000000 0.00000000 0.00000000 0.00000000 0.00000000 1.00000000 0.00000000 0.00000000 0.00000000 0.00000000
0.00000000
1.424322E+01 0.00000000 0.00000000 0.00000000 0.00000000 0.00000000 0.00000000 1.00000000 0.00000000 0.00000000 0.00000000
0.00000000
4.067050E+00 0.00000000 0.00000000 0.00000000 0.00000000 0.00000000 0.00000000 0.00000000 1.00000000 0.00000000 0.00000000
0.00000000
1.754643E+00 0.00000000 0.00000000 0.00000000 0.00000000 0.00000000 0.00000000 0.00000000 0.00000000 1.00000000 0.00000000
0.00000000
3.363182E-01 0.00000000 0.00000000 0.00000000 0.00000000 0.00000000 0.00000000 0.00000000 0.00000000 0.00000000 1.00000000
0.00000000
1.350861E-01 0.00000000 0.00000000 0.00000000 0.00000000 0.00000000 0.00000000 0.00000000 0.00000000 0.00000000 0.00000000
1.00000000
$ p functions
11 7 0
4.106684E+03 1.4225E-03 5.7021E-04 0.00000000 0.00000000 0.00000000 0.00000000 0.00000000 0.00000000
9.693471E+02 1.2057E-02 4.8491E-03 0.00000000 0.00000000 0.00000000 0.00000000 0.00000000 0.00000000
3.105258E+02 6.1443E-02 2.4975E-02 0.00000000 0.00000000 0.00000000 0.00000000 0.00000000 0.00000000
1.166637E+02 2.0152E-01 8.4407E-02 0.00000000 0.00000000 0.00000000 0.00000000 0.00000000 0.00000000
4.812571E+01 4.0415E-01 1.8090E-01 0.00000000 0.00000000 0.00000000 0.00000000 0.00000000 0.00000000
2.088559E+01 3.8893E-01 1.7468E-01 0.00000000 0.00000000 0.00000000 0.00000000 0.00000000 0.00000000
8.846983E+00 0.00000000 0.00000000 1.00000000 0.00000000 0.00000000 0.00000000 0.00000000 0.00000000
3.839338E+00 0.00000000 0.00000000 0.00000000 1.00000000 0.00000000 0.00000000 0.00000000 0.00000000
1.605191E+00 0.00000000 0.00000000 0.00000000 0.00000000 0.00000000 1.00000000 0.00000000 0.00000000
4.680879E-01 0.00000000 0.00000000 0.00000000 0.00000000 0.00000000 1.00000000 0.00000000 0.00000000
1.490880E-01 0.00000000 0.00000000 0.00000000 0.00000000 0.00000000 0.00000000 1.00000000
$ d functions
7 5 0
1.200481E+02 1.4755E-02 0.00000000 0.00000000 0.00000000 0.00000000
3.552605E+01 9.1608E-02 0.00000000 0.00000000 0.00000000 0.00000000
1.289256E+01 2.7516E-01 0.00000000 0.00000000 0.00000000 0.00000000
4.991605E+00 0.00000000 1.00000000 0.00000000 0.00000000 0.00000000
1.889243E+00 0.00000000 0.00000000 1.00000000 0.00000000 0.00000000
6.476664E-01 0.00000000 0.00000000 0.00000000 1.00000000 0.00000000
1.788622E-01 0.00000000 0.00000000 0.00000000 0.00000000 1.00000000
$ f functions
3 3 0
7.528700E+00 1.00000000 0.00000000 0.00000000
1.282966E+00 0.00000000 1.00000000 0.00000000
3.328661E-01 0.00000000 0.00000000 1.00000000

```

**Table S5.** Basis set pecJ-2 for selenium, Dalton format.

```

$ Se
a 34
$ s functions
22 15 0
4.443822E+08 5.6619E-08 1.7694E-08 0.00000000 0.00000000 0.00000000 0.00000000
0.00000000 0.00000000 0.00000000 0.00000000 0.00000000 0.00000000 0.00000000
0.00000000 0.00000000
7.050053E+07 3.3187E-07 1.0380E-07 0.00000000 0.00000000 0.00000000 0.00000000
0.00000000 0.00000000 0.00000000 0.00000000 0.00000000 0.00000000 0.00000000
0.00000000 0.00000000

```

|                |            |            |            |            |            |            |
|----------------|------------|------------|------------|------------|------------|------------|
| 1.041355E+07   | 5.7928E-06 | 1.8293E-06 | 0.00000000 | 0.00000000 | 0.00000000 | 0.00000000 |
| 0.00000000     | 0.00000000 | 0.00000000 | 0.00000000 | 0.00000000 | 0.00000000 | 0.00000000 |
| 0.00000000     | 0.00000000 |            |            |            |            |            |
| 1.376983E+06   | 5.0582E-05 | 1.5827E-05 | 0.00000000 | 0.00000000 | 0.00000000 | 0.00000000 |
| 0.00000000     | 0.00000000 | 0.00000000 | 0.00000000 | 0.00000000 | 0.00000000 | 0.00000000 |
| 0.00000000     | 0.00000000 |            |            |            |            |            |
| 3.335063E+05   | 2.4779E-04 | 7.8103E-05 | 0.00000000 | 0.00000000 | 0.00000000 | 0.00000000 |
| 0.00000000     | 0.00000000 | 0.00000000 | 0.00000000 | 0.00000000 | 0.00000000 | 0.00000000 |
| 0.00000000     | 0.00000000 |            |            |            |            |            |
| 9.200230E+04   | 1.1207E-03 | 3.4962E-04 | 0.00000000 | 0.00000000 | 0.00000000 | 0.00000000 |
| 0.00000000     | 0.00000000 | 0.00000000 | 0.00000000 | 0.00000000 | 0.00000000 | 0.00000000 |
| 0.00000000     | 0.00000000 |            |            |            |            |            |
| 2.967395E+04   | 4.0164E-03 | 1.2647E-03 | 0.00000000 | 0.00000000 | 0.00000000 | 0.00000000 |
| 0.00000000     | 0.00000000 | 0.00000000 | 0.00000000 | 0.00000000 | 0.00000000 | 0.00000000 |
| 0.00000000     | 0.00000000 |            |            |            |            |            |
| 1.070423E+04   | 1.3005E-02 | 4.1095E-03 | 0.00000000 | 0.00000000 | 0.00000000 | 0.00000000 |
| 0.00000000     | 0.00000000 | 0.00000000 | 0.00000000 | 0.00000000 | 0.00000000 | 0.00000000 |
| 0.00000000     | 0.00000000 |            |            |            |            |            |
| 4.148222E+03   | 3.7719E-02 | 1.2275E-02 | 0.00000000 | 0.00000000 | 0.00000000 | 0.00000000 |
| 0.00000000     | 0.00000000 | 0.00000000 | 0.00000000 | 0.00000000 | 0.00000000 | 0.00000000 |
| 0.00000000     | 0.00000000 |            |            |            |            |            |
| 1.725619E+03   | 0.00000000 | 0.00000000 | 1.00000000 | 0.00000000 | 0.00000000 | 0.00000000 |
| 0.00000000     | 0.00000000 | 0.00000000 | 0.00000000 | 0.00000000 | 0.00000000 | 0.00000000 |
| 0.00000000     | 0.00000000 |            |            |            |            |            |
| 7.670764E+02   | 0.00000000 | 0.00000000 | 0.00000000 | 1.00000000 | 0.00000000 | 0.00000000 |
| 0.00000000     | 0.00000000 | 0.00000000 | 0.00000000 | 0.00000000 | 0.00000000 | 0.00000000 |
| 0.00000000     | 0.00000000 |            |            |            |            |            |
| 3.540569E+02   | 0.00000000 | 0.00000000 | 0.00000000 | 0.00000000 | 1.00000000 | 0.00000000 |
| 0.00000000     | 0.00000000 | 0.00000000 | 0.00000000 | 0.00000000 | 0.00000000 | 0.00000000 |
| 0.00000000     | 0.00000000 |            |            |            |            |            |
| 1.675661E+02   | 0.00000000 | 0.00000000 | 0.00000000 | 0.00000000 | 0.00000000 | 1.00000000 |
| 0.00000000     | 0.00000000 | 0.00000000 | 0.00000000 | 0.00000000 | 0.00000000 | 0.00000000 |
| 0.00000000     | 0.00000000 |            |            |            |            |            |
| 8.094489E+01   | 0.00000000 | 0.00000000 | 0.00000000 | 0.00000000 | 0.00000000 | 0.00000000 |
| 1.00000000     | 0.00000000 | 0.00000000 | 0.00000000 | 0.00000000 | 0.00000000 | 0.00000000 |
| 0.00000000     | 0.00000000 |            |            |            |            |            |
| 3.573295E+01   | 0.00000000 | 0.00000000 | 0.00000000 | 0.00000000 | 0.00000000 | 0.00000000 |
| 0.00000000     | 1.00000000 | 0.00000000 | 0.00000000 | 0.00000000 | 0.00000000 | 0.00000000 |
| 0.00000000     | 0.00000000 |            |            |            |            |            |
| 1.748383E+01   | 0.00000000 | 0.00000000 | 0.00000000 | 0.00000000 | 0.00000000 | 0.00000000 |
| 0.00000000     | 0.00000000 | 1.00000000 | 0.00000000 | 0.00000000 | 0.00000000 | 0.00000000 |
| 0.00000000     | 0.00000000 |            |            |            |            |            |
| 8.669421E+00   | 0.00000000 | 0.00000000 | 0.00000000 | 0.00000000 | 0.00000000 | 0.00000000 |
| 0.00000000     | 0.00000000 | 0.00000000 | 1.00000000 | 0.00000000 | 0.00000000 | 0.00000000 |
| 0.00000000     | 0.00000000 |            |            |            |            |            |
| 3.664945E+00   | 0.00000000 | 0.00000000 | 0.00000000 | 0.00000000 | 0.00000000 | 0.00000000 |
| 0.00000000     | 0.00000000 | 0.00000000 | 0.00000000 | 1.00000000 | 0.00000000 | 0.00000000 |
| 0.00000000     | 0.00000000 |            |            |            |            |            |
| 1.624862E+00   | 0.00000000 | 0.00000000 | 0.00000000 | 0.00000000 | 0.00000000 | 0.00000000 |
| 0.00000000     | 0.00000000 | 0.00000000 | 0.00000000 | 0.00000000 | 1.00000000 | 0.00000000 |
| 0.00000000     | 0.00000000 |            |            |            |            |            |
| 5.344704E-01   | 0.00000000 | 0.00000000 | 0.00000000 | 0.00000000 | 0.00000000 | 0.00000000 |
| 0.00000000     | 0.00000000 | 0.00000000 | 0.00000000 | 0.00000000 | 0.00000000 | 1.00000000 |
| 0.00000000     | 0.00000000 |            |            |            |            |            |
| 2.507232E-01   | 0.00000000 | 0.00000000 | 0.00000000 | 0.00000000 | 0.00000000 | 0.00000000 |
| 0.00000000     | 0.00000000 | 0.00000000 | 0.00000000 | 0.00000000 | 0.00000000 | 0.00000000 |
| 1.00000000     | 0.00000000 |            |            |            |            |            |
| 9.266461E-02   | 0.00000000 | 0.00000000 | 0.00000000 | 0.00000000 | 0.00000000 | 0.00000000 |
| 0.00000000     | 0.00000000 | 0.00000000 | 0.00000000 | 0.00000000 | 0.00000000 | 0.00000000 |
| 0.00000000     | 1.00000000 |            |            |            |            |            |
| \$ p functions |            |            |            |            |            |            |
| 13             | 8          | 0          |            |            |            |            |
| 1.020290E+04   | 2.8852E-04 | 1.1040E-04 | 0.00000000 | 0.00000000 | 0.00000000 | 0.00000000 |
| 0.00000000     | 0.00000000 |            |            |            |            |            |
| 2.385085E+03   | 2.7773E-03 | 1.0953E-03 | 0.00000000 | 0.00000000 | 0.00000000 | 0.00000000 |
| 0.00000000     | 0.00000000 |            |            |            |            |            |
| 7.246974E+02   | 1.7261E-02 | 6.8573E-03 | 0.00000000 | 0.00000000 | 0.00000000 | 0.00000000 |
| 0.00000000     | 0.00000000 |            |            |            |            |            |
| 2.599333E+02   | 7.4340E-02 | 3.0010E-02 | 0.00000000 | 0.00000000 | 0.00000000 | 0.00000000 |
| 0.00000000     | 0.00000000 |            |            |            |            |            |



|              |            |            |            |            |            |            |
|--------------|------------|------------|------------|------------|------------|------------|
| 1.042775E+02 | 2.1704E-01 | 9.1417E-02 | 0.00000000 | 0.00000000 | 0.00000000 | 0.00000000 |
| 0.00000000   | 0.00000000 |            |            |            |            |            |
| 4.521224E+01 | 3.9428E-01 | 1.7705E-01 | 0.00000000 | 0.00000000 | 0.00000000 | 0.00000000 |
| 0.00000000   | 0.00000000 |            |            |            |            |            |
| 2.064791E+01 | 3.6400E-01 | 1.6148E-01 | 0.00000000 | 0.00000000 | 0.00000000 | 0.00000000 |
| 0.00000000   | 0.00000000 |            |            |            |            |            |
| 9.300946E+00 | 0.00000000 | 0.00000000 | 1.00000000 | 0.00000000 | 0.00000000 | 0.00000000 |
| 0.00000000   | 0.00000000 |            |            |            |            |            |
| 4.203860E+00 | 0.00000000 | 0.00000000 | 0.00000000 | 1.00000000 | 0.00000000 | 0.00000000 |
| 0.00000000   | 0.00000000 |            |            |            |            |            |
| 1.835088E+00 | 0.00000000 | 0.00000000 | 0.00000000 | 0.00000000 | 1.00000000 | 0.00000000 |
| 0.00000000   | 0.00000000 |            |            |            |            |            |
| 6.372571E-01 | 0.00000000 | 0.00000000 | 0.00000000 | 0.00000000 | 0.00000000 | 1.00000000 |
| 0.00000000   | 0.00000000 |            |            |            |            |            |
| 2.508116E-01 | 0.00000000 | 0.00000000 | 0.00000000 | 0.00000000 | 0.00000000 | 0.00000000 |
| 1.00000000   | 0.00000000 |            |            |            |            |            |
| 8.507613E-02 | 0.00000000 | 0.00000000 | 0.00000000 | 0.00000000 | 0.00000000 | 0.00000000 |
| 0.00000000   | 1.00000000 |            |            |            |            |            |

\$ d functions

|              |            |            |            |            |            |  |
|--------------|------------|------------|------------|------------|------------|--|
| 8            | 5          | 0          |            |            |            |  |
| 2.753441E+02 | 2.8912E-03 | 0.00000000 | 0.00000000 | 0.00000000 | 0.00000000 |  |
| 7.795287E+01 | 2.5978E-02 | 0.00000000 | 0.00000000 | 0.00000000 | 0.00000000 |  |
| 2.796792E+01 | 1.1369E-01 | 0.00000000 | 0.00000000 | 0.00000000 | 0.00000000 |  |
| 1.122825E+01 | 2.8390E-01 | 0.00000000 | 0.00000000 | 0.00000000 | 0.00000000 |  |
| 4.658535E+00 | 0.00000000 | 1.00000000 | 0.00000000 | 0.00000000 | 0.00000000 |  |
| 1.894959E+00 | 0.00000000 | 0.00000000 | 1.00000000 | 0.00000000 | 0.00000000 |  |
| 7.145110E-01 | 0.00000000 | 0.00000000 | 0.00000000 | 1.00000000 | 0.00000000 |  |
| 2.286113E-01 | 0.00000000 | 0.00000000 | 0.00000000 | 0.00000000 | 1.00000000 |  |

\$ f functions

|              |            |            |            |            |  |
|--------------|------------|------------|------------|------------|--|
| 4            | 4          | 0          |            |            |  |
| 9.489329E+00 | 1.00000000 | 0.00000000 | 0.00000000 | 0.00000000 |  |
| 2.271550E+00 | 0.00000000 | 1.00000000 | 0.00000000 | 0.00000000 |  |
| 5.063583E-01 | 0.00000000 | 0.00000000 | 1.00000000 | 0.00000000 |  |
| 1.137481E-01 | 0.00000000 | 0.00000000 | 0.00000000 | 1.00000000 |  |

\$ g functions

|              |            |   |  |
|--------------|------------|---|--|
| 1            | 1          | 0 |  |
| 2.237599E-01 | 1.00000000 |   |  |

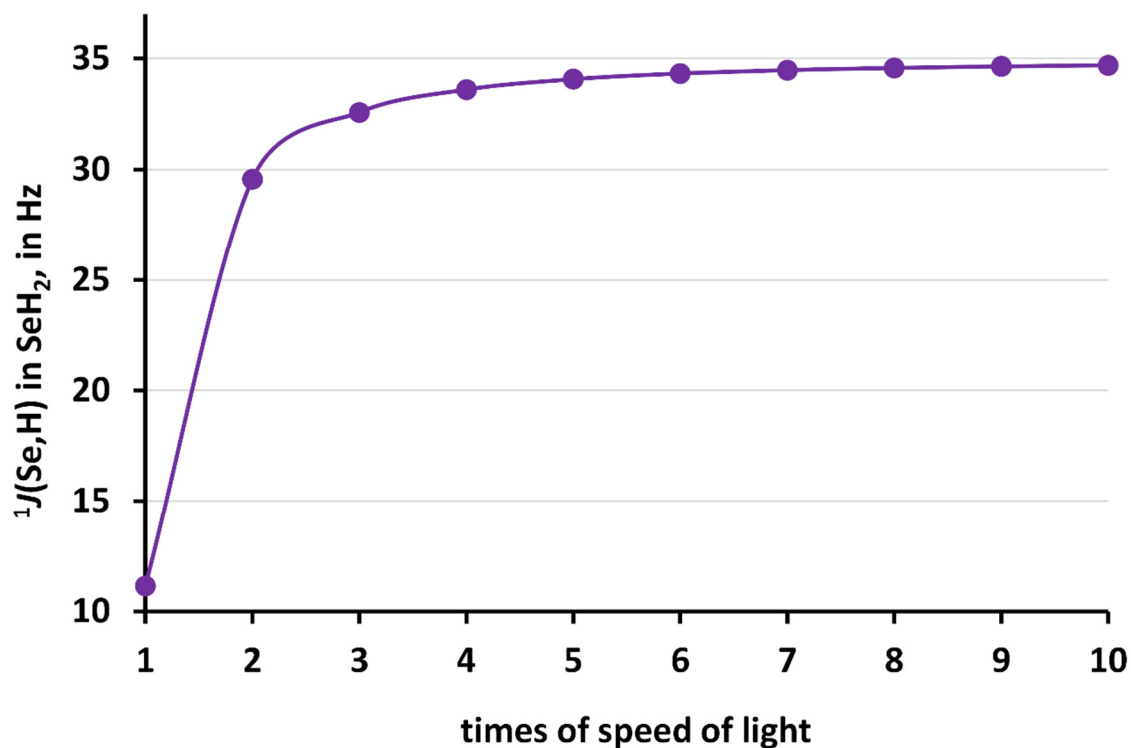

**Figure S1.** The convergence of  $^1J(\text{Se,H})$  in  $\text{SeH}_2$  calculated at the 4-component DFT(SVWN5)//pecJ-2(uc) level with increasing the speed of light by 1 (totally relativistic calculation) to 10 (“10c limit scheme”) times.

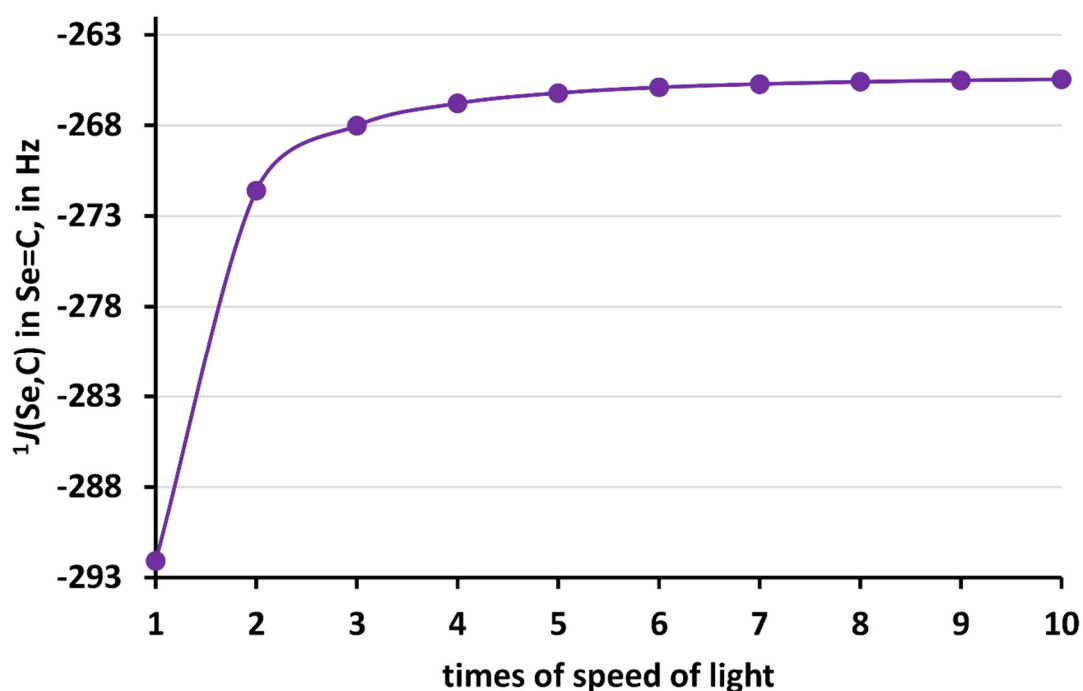

**Figure S2.** The convergence of  $^1J(\text{Se,C})$  in  $\text{Se}=\text{C}$  calculated at the 4-component DFT(SVWN5)//pecJ-2(uc) level with increasing the speed of light by 1 (totally relativistic calculation) to 10 (“10c limit scheme”) times.
